# Supplementary material for: Proteomic Study of Low-Birth-Weight Nephropathy in Rats
Source: MDPI journal article supplement (doi:10.3390/ijms221910294), 2021-09-24
Supplement: s1 [file s1]

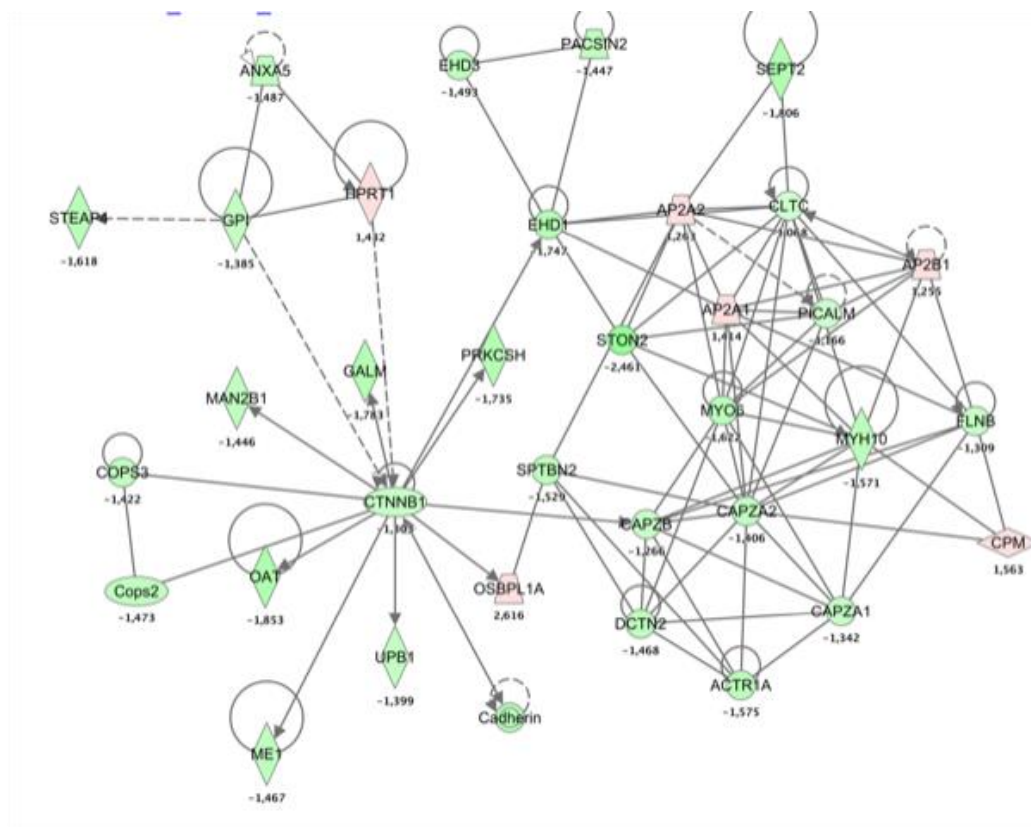

**Figure S1. Network of proteins involved in the regulation of cell architecture altered in the LBW kidney.** Green = protein repressed and pink = protein upregulated in the LBW proteomics data.

**Table S1. Differential proteomics quantitative data.** (A) The normalized content for each protein was determined on N=7 animals per group. ANOVA was performed to calculate the *p* value of the difference in protein content for each protein detected in the analysis between the LBW and NBW groups. The fold change (LBW/NBW) is given in the table. (B) Multiple comparison analysis with Benjamini and Hochberg correction was performed on the raw proteomic dataset to calculate the adjusted p value (q value).

**Table S2. Pathway and regulator IPA analysis of the LBW proteomic dataset.** Results of the ‘core analysis’ (A) ‘pathways’ and (B) ‘regulators’ analysis of the LBW kidney proteome obtained using IPA (Qiagen). For (A) and (B) the background gene-set for “Core Analysis” was set to “Ingenuity Knowledgebase”. For (C) the background gene-set for “Core Analysis” was set to “authors dataset”.
